# Supplementary material
Source: PubMed Central journal article supplement (PMC3583272)
Supplement: supp_jit001_jitsupp_fig1.pdf [file supp_jit001_jitsupp_fig1.pdf]

Figure S1

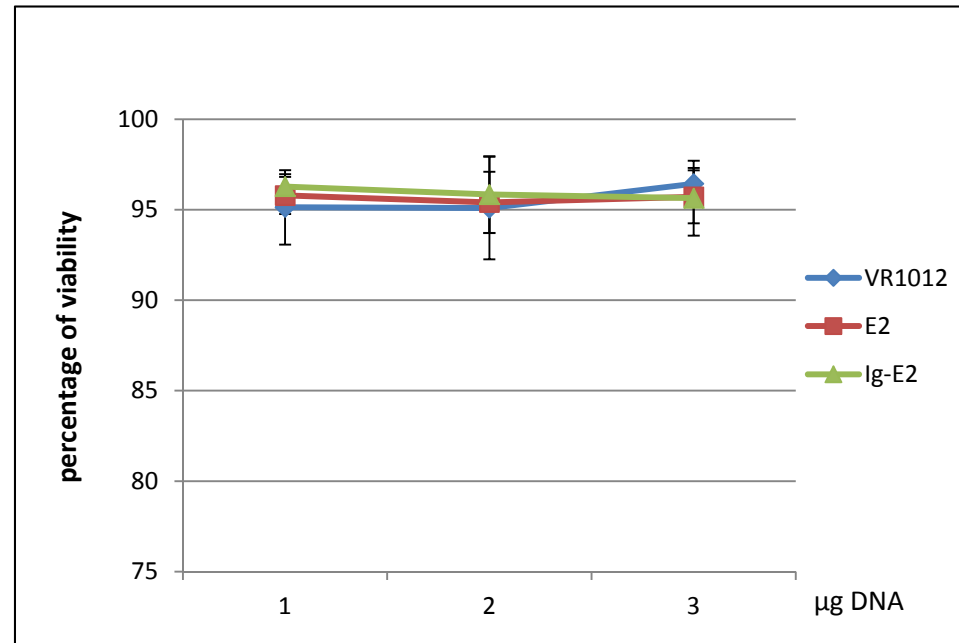

Fig. S1 293T cells were transfected with different does of empty vector VR1012, E2 and Ig-E2 expression vectors in a 12-well tissue culture plate. Forty eight hours post transfection, cells were harvested and stained by LIVE/DEAD® Cell Vitality Assay Kit (Invitrogen). Cells were analyzed on a BD Biosciences FACScalibur, exciting at 488 nm and measuring the fluorescence emission at 530 nm and 575 nm. 1 µg DNA is what we normally used DNA amount for transfection in a 12-well plate.
