# Supplementary material
Source: PubMed Central journal article supplement (PMC3583272)
Supplement: supp_jit001_jitsupp_fig2.pdf [file supp_jit001_jitsupp_fig2.pdf]

Fig. S2

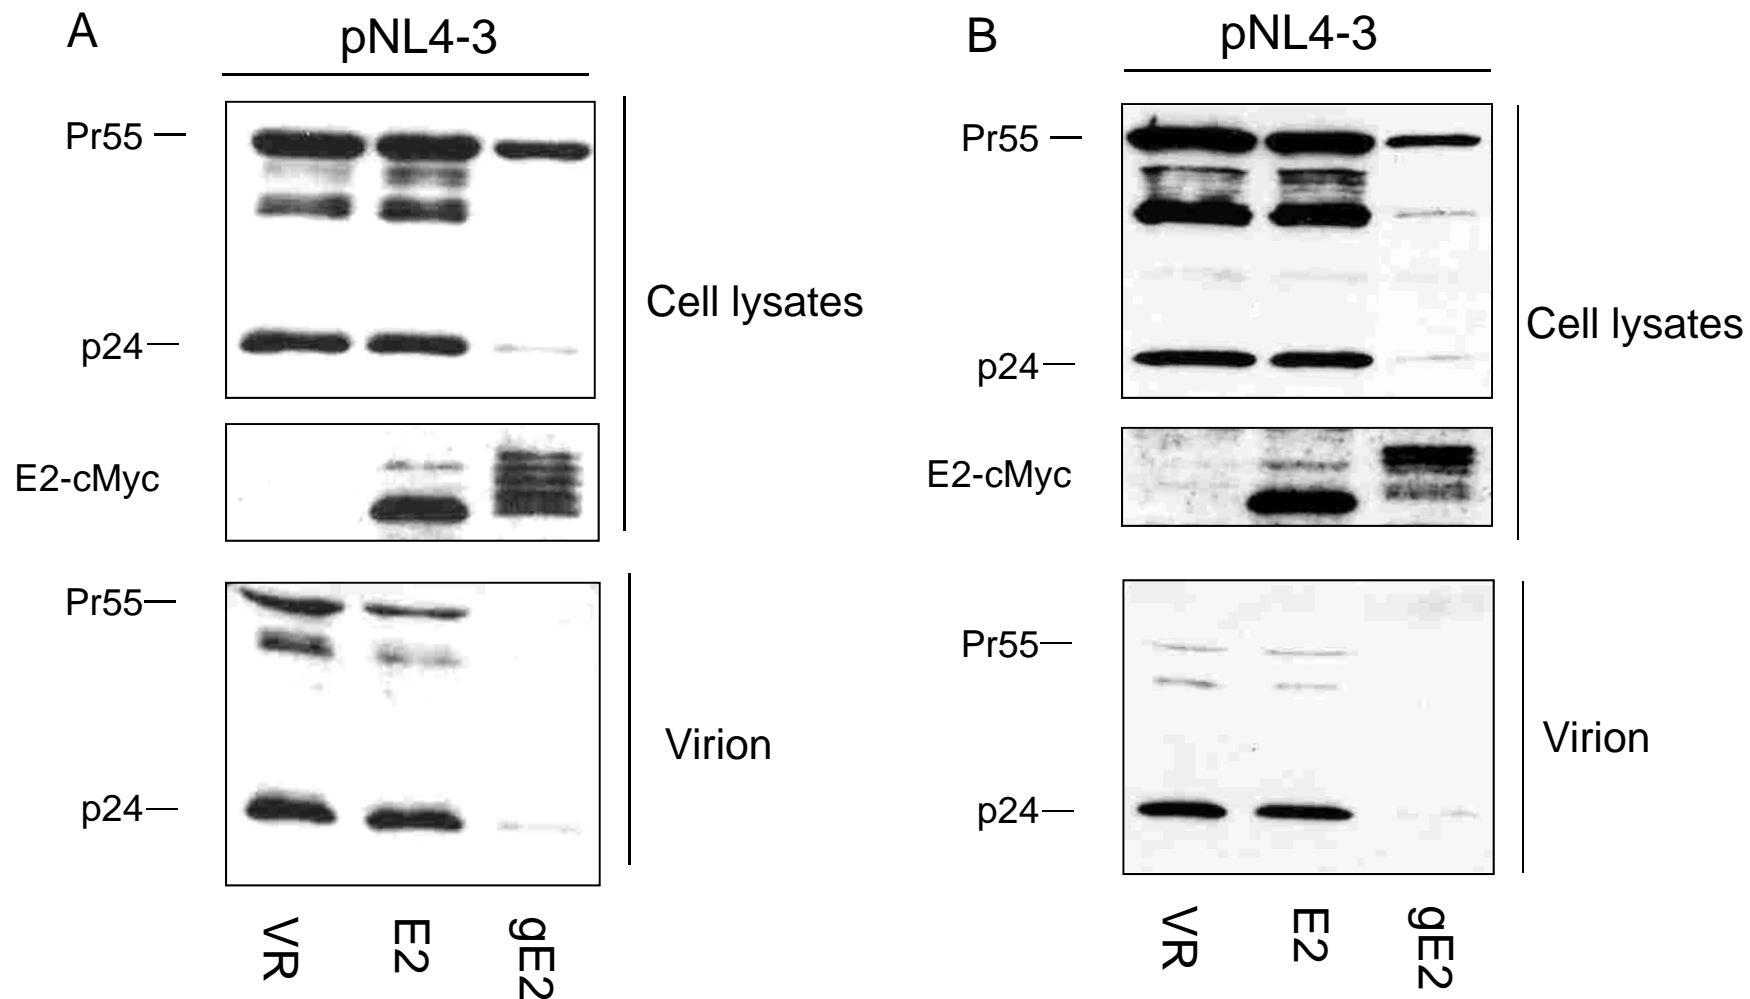

The HIV-1 proviral construct NL4-3 was co-transfected with empty vector, E2 or Ig-E2 expression constructs into SupT1 (A) or Jurkat (B) cells. Cell lysates and viral pellets were analyzed by Western blotting as mentioned in Fig 2A.
